# Supplementary material for: Identification of a Novel Deltavirus in Boa Constrictors
Source: PubMed Central journal article supplement (PMC6445931; doi:10.1128/mbio.00014-19), 2019-04-02
Supplement: mBio.00014-19-sf001.pdf [file mBio.00014-19-sf001.pdf]

# Amino acid alignment of snake, human and avian HDAG

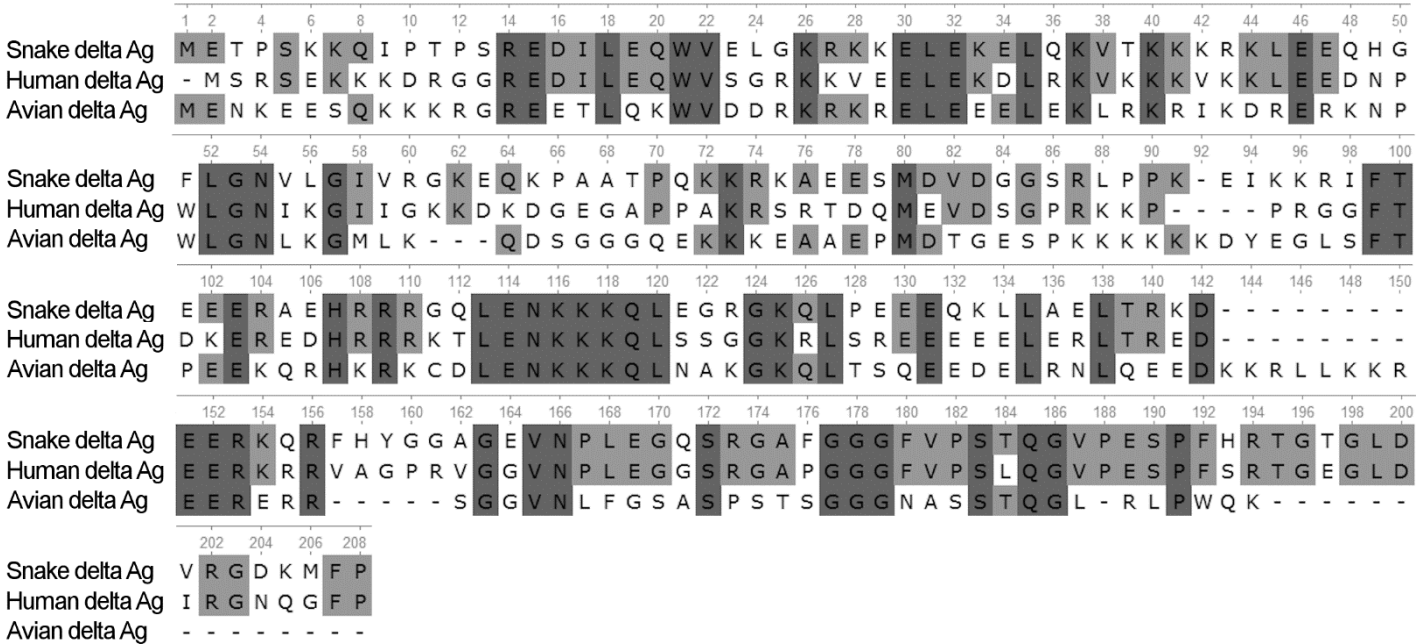

## Amino acid identities between snake, human and avian HDAG

|                             | AYF55701.1<br>Snake HDAG | AWI66689.1<br>Human small HDAG | AYC81245.1<br>Avian HDAG |
|-----------------------------|--------------------------|--------------------------------|--------------------------|
| AYF55701.1 Snake HDAG       | 100 %                    |                                |                          |
| AWI66689.1 Human small HDAG | 55 %                     | 100 %                          |                          |
| AYC81245.1 Avian HDAG       | 37 %                     | 39 %                           | 100 %                    |

## Amino acid sequence of putative L-sHDAG

METPSKQIPTPSREDILEQWVELGKRKKELEKELQKVTKKKRKLEEQHGFLGNVLGIVRGKEQKPAATPQKKRKAEEESMDVDGGSRLPPKEIKKRIFTEEERAHRRRGQLENKKKQLEGRGKQLPEEEQKLLAEELTRKDRKDEERKQRFHYGGAGEVNPLEGQSRGAFGGGFVFPSTQGVPESPFHRRTGTGLDVRGDKMFPWKRNEERRSERGEEERSREKPE

### S-sHDAG

Number of amino acids: 199  
Molecular weight: 22728.8  
Theoretical pI: 9.74

### L-sHDAG

Number of amino acids: 221  
Molecular weight: 25583.9  
Theoretical pI: 9.69

## WoLF PSORT prediction of human and snake S-HDAG

>AAQ09794.1 small delta antigen [Hepatitis delta virus]  
MSRSESKRNRDREGILEQWVNGRKKLEDLEREARKIKKKIKKLEDENPWLGNIGKILGKDKDGE GAPPAKRARTDQMEIDSGPGKRPLRGGFSDKERQDHRRRKALENKRKQLAAGGKHLKKEEEELKRLTEEDERRETAGPSVGGVNPLEGGSRGAPGGGFVNPMLSPVPESPFSRTGEGLDVRGNQGF

WoLFPSORT prediction: nucl: 27, extr: 2, cyto: 2, mito: 1

>AYF55701.1 delta antigen [Snake deltavirus F18-5]  
METPSKQIPTPSREDILEQWVELGKRKKELEKELQKVTKKKRKLEEQHGFLGNVLGIVRGKEQKPAATPQKKRKAEEESMDVDGGSRLPPKEIKKRIFTEEERAHRRRGQLENKKKQLEGRGKQLPEEEQKLLAEELTRKDRKDEERKQRFHYGGAGEVNPLEGQSRGAFGGGFVFPSTQGVPESPFHRRTGTGLDVRGDKMFP

WoLFPSORT prediction: nucl: 25.5, cyto\_nucl: 16.5, cyto: 6.5
