# Supplementary material for: Identification of a Novel Deltavirus in Boa Constrictors
Source: PubMed Central journal article supplement (PMC6445931; doi:10.1128/mbio.00014-19), 2019-04-02

# Snake HDV RT-PCR, random snakes from breeder #3

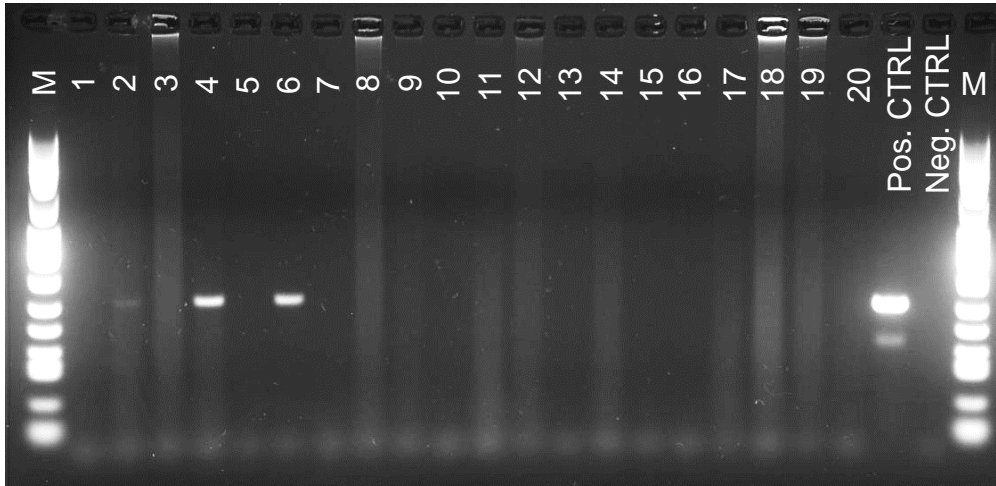

- Samples: 1. Snake No. 1    9. Snake No. 9    17. Snake No. 17  
 2. Snake No. 2    10. Snake No. 10    18. Snake No. 18  
 3. Snake No. 3    11. Snake No. 11    19. Snake No. 19  
 4. Snake No. 4    12. Snake No. 12    20. Snake No. 20  
 5. Snake No. 5    13. Snake No. 13    M = marker  
 6. Snake No. 6    14. Snake No. 14    Pos. CTRL, F18-5  
 7. Snake No. 7    15. Snake No. 15    Neg. CTRL, non-template control  
 8. Snake No. 8    16. Snake No. 16

## Sanger sequenced RT-PCR products of snakes No. 2, 4 and 6 aligned to snake HDV database sequence

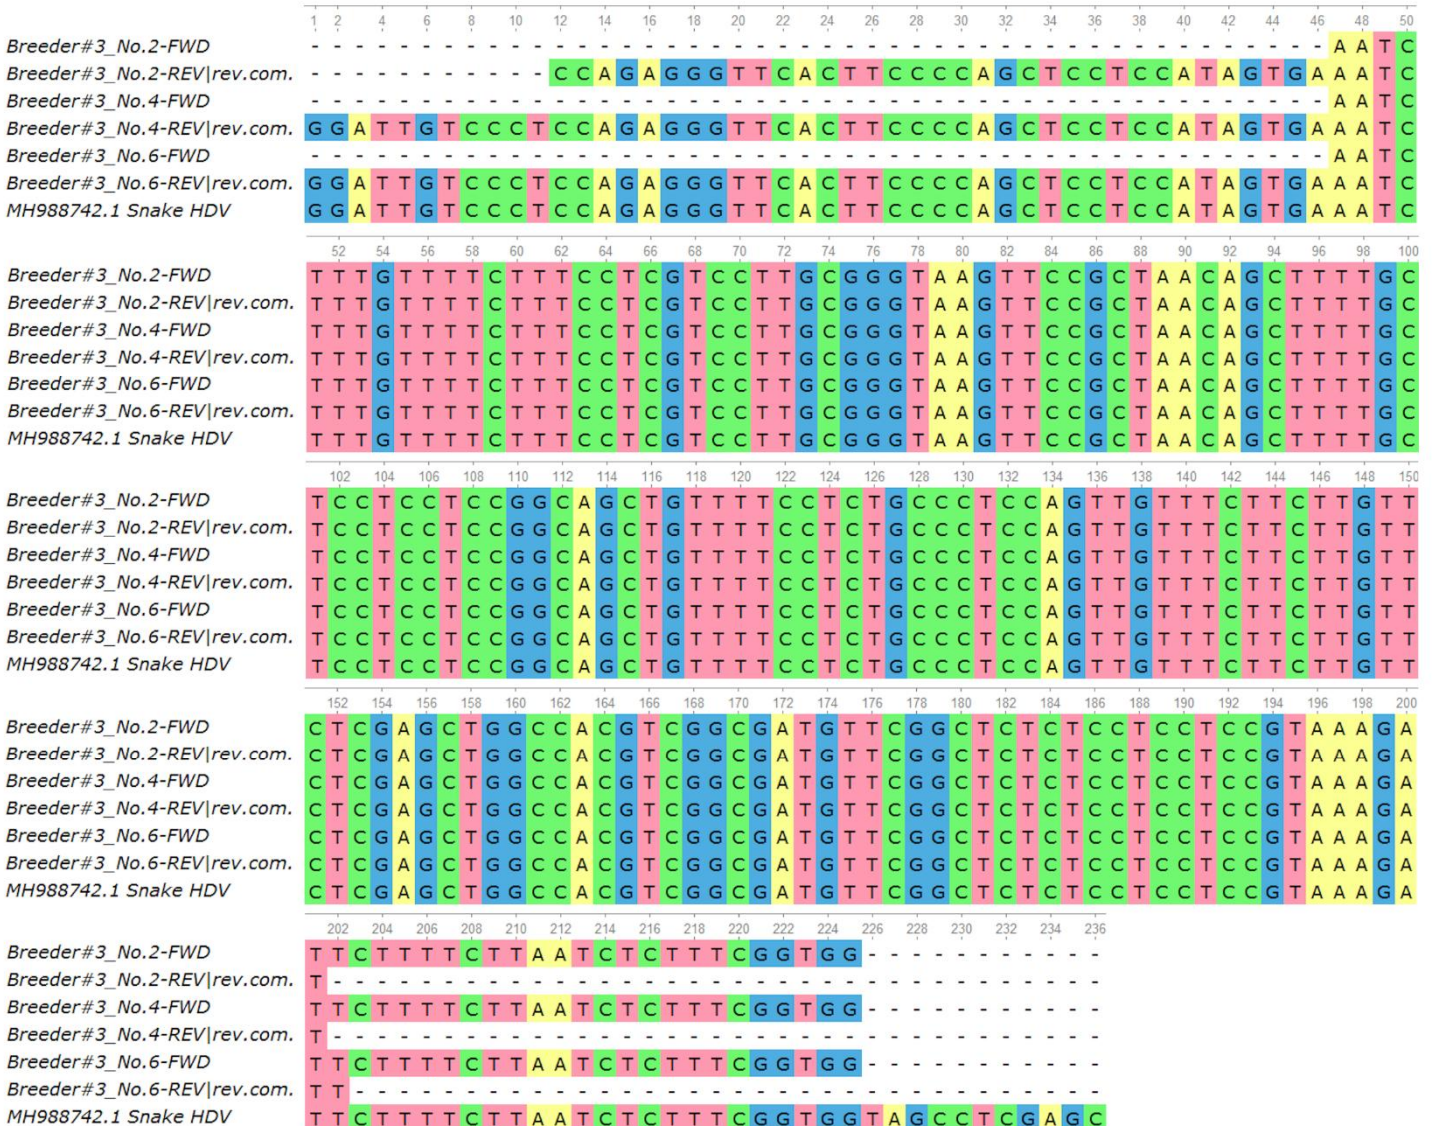

Supplement: mBio.00014-19-sf002.pdf [file mBio.00014-19-sf002.pdf]
